# Supplementary material for: Circular RNA circ_0000423 regulates cartilage ECM synthesis via circ_0000423/miRNA-27b-3p/MMP-13 axis in osteoarthritis
Source: Aging (Albany NY). 2022 Apr 19;14(8):3400–15. doi: 10.18632/aging.204018 (PMC9085232; doi:10.18632/aging.204018)
Supplement: Supplementary Material [file aging-14-204018-s001.xlsx]

## Sheet: up_OA_vs_FNF
Supplementary Material
# Fold Change cut-off: 1.5 # P-value cut-off: 0.05 # Condition pairs: OA_vs_FNF # Column A: probeID it represents probe name. # Column B: P-value, P-value calculated from unpaired t-test. # Column C: FDR, FDR is calculated from Benjamini Hochberg FDR. # Column D: FC (abs), the absolute ratio (no log scale) of normalized intensities between two conditions. # Column E: Regulation, it depicts which …
OA_vs_YN 1.5 fold up regulated CircRNAs
	P-value and FDR		Fold change and Regulation		Annotations										Group--Raw Intensity		Group--Normalized Intensity		Raw Intensity								Normalized Intensity
probeID	P-value	FDR	FC (abs)	Regulation	circRNA	Alias	circRNA_type	chrom	strand	txStart	txEnd	best_transcript	GeneSymbol	Sequence	group-OA(raw)	group-YN(raw)	group-OA(normalized)	group-YN(normalized)	[OA1, OA](raw)	[OA2, OA](raw)	[OA3, OA](raw)	[OA4, OA](raw)	[YN1, YN](raw)	[YN2, YN](raw)	[YN3, YN](raw)	[YN4, YN](raw)	[OA1, OA](normalized)	[OA2, OA](normalized)	[OA3, OA](normalized)	[OA4, OA](normalized)	[YN1, YN](normalized)	[YN2, YN](normalized)	[YN3, YN](normalized)	[YN4, YN](normalized)
ASCRP000010	0.00633687	0.210369	3.24297	up	hsa_circRNA_000094	hsa_circ_0000247	exonic	chr10	+	74474868	74475660	ENST00000603649	MCU	ACATTCGCAGGTCTTTCACTACCATTCCTACAGTGATTGGCAAGAT	145.042	56.4167	6.80482	5.1075	93.5	237.333	126	123.333	30.3333	26	89.1667	80.1667	5.84641	7.06514	7.10053	7.2072	4.71816	4.65935	5.76591	5.2866
ASCRP000019	0.0137573	0.311451	1.66389	up	hsa_circRNA_000178	hsa_circ_0000549	intronic	chr14	+	70236227	70236759	NM_001039465	SRSF5	ATAATAATAAAGCCTGTCTGTGTCGTTGGCCTTATGACGAGGAGTG	54.75	44.125	5.36141	4.62685	91.3333	54.5	40.5	32.6667	41	25.6667	59	50.8333	5.79234	5.2132	5.47764	4.96245	4.958	4.61673	4.51484	4.41782
ASCRP000064	0.0024598	0.121499	2.7776	up	hsa_circRNA_000554	hsa_circ_0000376	intronic	chr12	-	11199618	11248400	uc001qzf.2	PRB4	ACTCCATCTATCCATATGAGAGTTGGATTCTCACTCTGTTGTCCAC	106.583	46.7083	6.31238	4.83854	172.167	132.5	57.1667	64.5	38.3333	39	59.6667	49.8333	6.74481	6.3147	5.92329	6.26671	4.89635	5.50092	4.51019	4.44668
ASCRP000096	0.00115047	0.0882038	8.06742	up	hsa_circRNA_000676	hsa_circ_0001234	intragenic	chr22	+	41620952	41622347	NM_031488	L3MBTL2	GGCCCCAGAACTGTCCCATTCCTTTAAGGTACGAGCAGTCTACACA	578.042	79.1667	8.4895	5.4774	1041.67	804.667	237.833	228	115.333	60.5	77.8333	63	9.31742	8.97341	7.75851	7.90868	6.01008	6.11696	5.07039	4.71215
ASCRP000140	0.0262385	0.357243	1.60692	up	hsa_circRNA_000864	hsa_circ_0000662	intronic	chr16	-	398402	398484	NM_003502	AXIN1	CAGCAGTGTGGACTGTTGGCTGGTAAAGTGTGTGCAATGTGAGGAA	56	48.0417	5.40253	4.71824	94.5	53.6667	42.3333	33.5	48	26.5	56.6667	61	5.83725	5.20955	5.58559	4.97775	5.09838	4.66331	4.47399	4.63727
ASCRP000144	0.0210471	0.351014	4.0013	up	hsa_circRNA_000881	hsa_circ_0000788	intronic	chr17	+	55372279	55372525	NM_138962	MSI2	ATGATGGATGGGCCTAGTTTGCCTTTGAGTGTGTGTCTGTTTGGGG	238.083	85.7083	7.45113	5.45066	274.5	413.333	160.667	103.833	171.167	73.3333	61.3333	37	7.4251	7.99038	7.44327	6.94577	6.52373	6.46758	4.59577	4.21556
ASCRP000150	0.0449004	0.406989	3.2248	up	hsa_circRNA_000911	hsa_circ_0001184	intronic	chr21	+	34797903	34797990	NM_005534	IFNGR2	AAACATCACTATGGCTGGTGAACGTGTGTGCTGGTGTCCCTGGGCA	327.042	144.875	7.96474	6.27553	500.667	409.833	249.667	148	313.667	115.333	92.1667	58.3333	8.11365	7.96471	8.21435	7.56625	7.37849	7.20547	5.95693	4.56124
ASCRP000161	0.0211039	0.351014	2.25657	up	hsa_circRNA_000950	hsa_circ_0001525	intronic	chr5	+	131761180	131761386	NR_045116	C5orf56	TGCTTAACATGGGAGATGTCCACACACAGTCATACCTGTGTTTGAA	113.542	64.125	6.42825	5.25412	165	155.833	66	67.3333	56.5	66.1667	68.3333	65.5	6.69707	6.48926	6.20013	6.32656	5.2336	6.28771	4.72923	4.76594
ASCRP000172	0.0121054	0.290173	1.62302	up	hsa_circRNA_000993	hsa_circ_0001887	intragenic	chr9	-	125930467	125936121	NM_001171137	STRBP	TGTTAATTCTGGGATCAAGGTGGTCGGACATTGTGTGGTGTAATGA	49.9583	41.3333	5.33	4.63133	51.6667	65.1667	46.3333	36.6667	35.6667	29	50.8333	49.8333	4.97376	5.4021	5.67323	5.27093	4.86042	4.86218	4.38625	4.41645
ASCRP000205	0.0107308	0.273299	1.64569	up	hsa_circRNA_001109	hsa_circ_0001056	intragenic	chr2	-	100721965	100754399	NM_001025108	AFF3	CCCCTTCCCGCTGGGAGTGGAGTATGAAGACCAAGGAATTCTCTTA	69.75	60.2917	5.80645	5.08776	103.167	75.5	50	50.3333	68.5	35.6667	71.1667	65.8333	6.01575	5.58914	5.78722	5.83371	5.40837	5.37248	4.84222	4.72798
ASCRP000212	0.0271665	0.357243	2.3764	up	hsa_circRNA_001153	hsa_circ_0001455	antisense	chr4	+	164514761	164515093	NM_001166373	MARCH1	GGTTTTATAAGCTCATCCTCAACCATGACTTCCTTCCAATTTTGTC	100.708	59.625	6.37991	5.13113	95	114.833	97	96	67	53.6667	62	55.8333	5.8294	6.11285	6.72576	6.85165	5.39239	6.01313	4.58849	4.53052
ASCRP000266	0.00982372	0.273299	1.57189	up	hsa_circRNA_001401	hsa_circ_0000965	intragenic	chr19	-	58472758	58476205	NM_152474	C19orf18	GAAAAGTTCATCCACTCAGGATTCCATTGTATCCCACCAGAAACAG	53	50.3333	5.42041	4.76791	55.5	65.6667	41.3333	49.5	34.3333	25.6667	72	69.3333	5.00708	5.40049	5.47083	5.80323	4.80728	4.57928	4.83542	4.84965
ASCRP000314	1.3736e-07	0.000223897	3.50303	up	hsa_circRNA_001676	hsa_circ_0000423	exonic	chr12	-	80180153	80183460	ENST00000550903	PPP1R12A	AAAGGCCACCCAGCCCTGTAAGACCAGTAATAAATTTCTGTCTACT	96	39.125	6.29556	4.48696	124	118	75	67	29.5	25	51	51	6.30364	6.17368	6.38787	6.31706	4.56288	4.56111	4.36922	4.45462
ASCRP000303	0.0234613	0.357243	2.76808	up	hsa_circRNA_001594	hsa_circ_0001343	antisense	chr3	-	140954867	140955044	NM_001037172	ACPL2	AGCCGCCATCCATCTCTACTACCACATGTTTGAGTTCCCCCAAACT	363	157.375	8.15906	6.69018	614.5	394.667	260.333	182.5	302	145.167	90	92.3333	8.51853	7.88959	8.2712	7.95693	7.31836	7.64756	5.7989	5.99589
ASCRP000311	0.037784	0.375536	1.82138	up	hsa_circRNA_001654	hsa_circ_0001605	intronic	chr6	+	42903447	42905047	NM_006586	CNPY3	GGAAGGTCAGGCCTGCATGTATCTTAGTGTGTCTGCTGGTGTGAGT	83.9583	58.7917	5.96482	5.09979	109.167	121.333	61.3333	44	64.1667	32.8333	44.6667	93.5	6.09861	6.19442	6.03417	5.53209	5.3418	5.1572	4.27754	5.62263
ASCRP000391	0.0468146	0.40949	3.16555	up	hsa_circRNA_100001	hsa_circ_0009189	exonic	chr1	+	871151	874792	uc001abx.1	SAMD11	CCCAGCCACGCCAGGACGGCAACCTTCCCACCCTCATATCCAGCGT	262.417	137.083	7.592	5.92955	375.5	407.667	130.333	136.167	330.5	74.1667	77.3333	66.3333	7.8467	7.94896	7.1448	7.42754	7.45085	6.51659	4.98677	4.76397
ASCRP000591	0.000787399	0.0739887	5.43197	up	hsa_circRNA_100202	hsa_circ_0012185	exonic	chr1	-	45340349	45341367	uc001cmt.2	EIF2B3	TGGAGGAAGGGTGCCCAAATTGCTGTCTGCTCTCTGTCCAGAAGAA	269.583	71.9583	7.79939	5.35791	315.5	247.333	348.667	166.833	100.167	41.1667	80.1667	66.3333	7.63014	7.15129	8.66683	7.7493	5.86434	5.55021	5.2305	4.78661
ASCRP000706	2.41831e-05	0.00788369	7.34273	up	hsa_circRNA_100319	hsa_circ_0013912	exonic	chr1	-	145601529	145601852	uc001eog.3	POLR3C	ATTGTCTTCCAATGAGCCCATTCCAGATGATGGGATTTATTGGCAG	246.625	40.0833	7.43238	4.55607	402.333	343.667	115.833	124.667	28.5	29.6667	52.5	49.6667	7.90932	7.64813	6.93498	7.23711	4.5498	4.89491	4.35341	4.42615
ASCRP000716	0.00629219	0.210369	2.39287	up	hsa_circRNA_100331	hsa_circ_0000128	exonic	chr1	+	151139409	151139890	uc001ewz.3	SCNM1	TAACAGTTGCTGCCGCCGGAAGTACAGCTTTGCTTGTGCCATCTGC	78.3333	44	5.99794	4.7392	107.5	66.8333	87.6667	51.3333	33.3333	34.5	59.1667	49	6.0915	5.41654	6.57357	5.91014	4.78966	5.26019	4.49175	4.41519
ASCRP000741	0.047602	0.40949	1.58021	up	hsa_circRNA_100356	hsa_circ_0014624	exonic	chr1	-	155734790	155736500	uc001fmb.4	GON4L	TTCTGTCCCAGAACTCCAGGCCAGTCTGCCATCCATCCAGGAAGAA	225.917	124.292	7.44683	6.78671	225.667	392.667	137	148.333	180.5	106.833	113	96.8333	7.15342	7.87826	7.20675	7.54887	6.64842	7.11539	7.11724	6.26578
ASCRP000745	0.0184308	0.333802	1.54603	up	hsa_circRNA_100360	hsa_circ_0005758	exonic	chr1	-	155891165	155893478	uc009wrl.1	KIAA0907	CACTGGACAGTCACCCCAAACCAGAAGGCCTGGCTGCTGCCAAGAA	69.4167	59.8333	5.6886	5.06003	71.1667	119.667	42.5	44.3333	61	31	77.6667	69.6667	5.40277	6.1977	5.51729	5.63666	5.31027	4.96238	5.02959	4.93789
ASCRP000760	0.0218465	0.356098	6.16227	up	hsa_circRNA_100375	hsa_circ_0006758	exonic	chr1	+	165859440	165860559	uc001gdp.3	UCK2	TTTGTCTCCCATTCCCGTCTTCCGTGTGTGCTAAGATCGTGCAGCT	868.958	237	9.29641	6.67295	1796.5	877.667	424.333	377.333	599	190.833	87.5	70.6667	9.87253	9.10703	9.01572	9.19034	8.18141	7.99848	5.60053	4.91137
ASCRP000776	0.0210037	0.351014	2.14021	up	hsa_circRNA_100391	hsa_circ_0015243	exonic	chr1	+	171548492	171556890	uc010pmi.2	PRRC2C	GTCCCTTCCGCTCAAATCCCAGCCTTCTATATGGACACAAGTCATT	155.208	97.875	6.91545	5.8177	229.167	176.333	113.167	102.167	158.333	70.3333	86.1667	76.6667	7.18142	6.64123	6.90474	6.93443	6.38468	6.36784	5.48957	5.02872
ASCRP000789	0.0400704	0.385772	2.25645	up	hsa_circRNA_100405	hsa_circ_0002846	exonic	chr1	+	178252698	178269253	uc009wxb.2	RASAL2	ACTAAACTGGATGTGAAAGGACCACCCACCCACCGTCTGTCTTGTG	158.833	98.5417	7.00802	5.83396	130.833	227.667	130.167	146.667	162	75.1667	84	73	6.37668	6.95854	7.13912	7.55774	6.41245	6.52958	5.39161	5.00221
ASCRP000816	8.51103e-05	0.0231216	7.1993	up	hsa_circRNA_100433	hsa_circ_0003600	exonic	chr1	+	204082042	204086835	uc010pqp.2	SOX13	ATTCAGCCCATTCCCTGCAAACCAGGATGTCCATGAGGAGCCCCAT	372.292	65.4167	8.0599	5.21204	610.667	537.5	174.333	166.667	75.3333	42	76	68.3333	8.47702	8.44094	7.55753	7.76411	5.49807	5.59116	4.94513	4.8138
ASCRP001007	0.000851554	0.0739887	32.2498	up	hsa_circRNA_100633	hsa_circ_0018909	exonic	chr10	+	76970891	76982160	uc010qle.2	VDAC2	AAATATCAGTTGGATCCCACTGCTTCCATTTCTATTCCCCTCTTCC	1804.96	69.625	10.5204	5.5092	644.667	3514.17	1590	1471	47	91	87.8333	52.6667	8.61812	11.2597	11.1019	11.1019	5.08775	6.85422	5.6511	4.44371
ASCRP001011	0.0110849	0.277974	1.83999	up	hsa_circRNA_100637	hsa_circ_0006956	exonic	chr10	+	86177526	86185649	uc001kdh.1	FAM190B	CACTATCATCACCATGGAAAAAGTGACTTGAGCAGGATATTTTGAA	74.2083	51.5	5.8727	4.993	98	91.5	47	60.3333	30	42	65.3333	68.6667	5.89125	5.80862	5.65355	6.13739	4.66828	5.60893	4.67631	5.01848
ASCRP001070	0.0442368	0.406989	2.81894	up	hsa_circRNA_100696	hsa_circ_0008896	exonic	chr10	+	122273422	122280607	uc001ley.1	PPAPDC1A	CATTCCTCCTGCAATTTCTTTCCTCACACCCCTGGCTGTTATTTGT	142.208	76.4167	6.74465	5.2495	128.333	254.833	91.8333	93.8333	162.833	53	50.6667	39.1667	6.3092	7.22784	6.64824	6.79334	6.42171	5.98226	4.35333	4.2407
ASCRP001164	0.000275359	0.0510096	1.73822	up	hsa_circRNA_100790	hsa_circ_0000288	exonic	chr11	+	34111725	34112225	uc001mvg.3	CAPRIN1	ATTCCAATCCATGCAAACGGTTCCTTTGGTATCATCCACAAGTGAG	53.1667	42.75	5.30243	4.50481	81.3333	61.1667	36.1667	34	27.3333	24.6667	65	54	5.52636	5.31271	5.28428	5.08635	4.45205	4.41461	4.66197	4.49063
ASCRP001227	0.0245815	0.357243	1.59258	up	hsa_circRNA_100853	hsa_circ_0022997	exonic	chr11	+	66288740	66291353	uc001oii.1	BBS1	GTGACAAGGCCCTGCTCAATGTCATCCACACCCCGATGAGCCTTCC	61.0417	54.7917	5.62975	4.95838	70.3333	78.3333	44.6667	50.8333	60.6667	36	62.1667	60.3333	5.35584	5.63914	5.64035	5.88369	5.32948	5.26928	4.58799	4.64679
ASCRP001281	0.0308207	0.369242	1.51253	up	hsa_circRNA_100908	hsa_circ_0023881	exonic	chr11	-	85685750	85687725	uc001pbo.1	PICALM	ATCAGGAGCACAGGCACCCCCTGTAATGGCCTATCCTGCTACTACA	66.25	60.0417	5.6398	5.04284	89.6667	91.3333	44	40	71	37	67.1667	65	5.71307	5.80002	5.60166	5.44443	5.46418	5.29732	4.68416	4.72568
ASCRP001388	0.00360818	0.16337	2.04431	up	hsa_circRNA_101018	hsa_circ_0025513	exonic	chr12	+	14609494	14610229	uc001rby.4	ATF7IP	GTGAATACAGCATCCACCCAACCCACCAGTATCACCAGGAAAAACT	168.25	89.1667	7.0547	6.02309	194	226.667	114.333	138	103.167	72.5	94.6667	86.3333	6.93076	6.95965	6.89584	7.43256	5.90791	6.44536	6.15824	5.58085
ASCRP001401	0.0119086	0.289717	4.34625	up	hsa_circRNA_101031	hsa_circ_0007478	exonic	chr12	-	27143382	27152609	uc010sjl.2	TM7SF3	GTGCTTCCCTAGACTCTCCTTTCCAATTCCTCGGAAACAGGCACTG	377.333	136.708	8.31418	6.19441	302.833	557.667	329.167	319.667	298.333	83.5	88.3333	76.6667	7.39155	8.36612	8.57915	8.9199	7.32848	6.68323	5.62639	5.13953
ASCRP001505	0.000197464	0.045981	4.45554	up	hsa_circRNA_101139	hsa_circ_0028173	exonic	chr12	+	110764194	110780253	uc001tqk.4	ATP2A2	AAGTTGTCTGGTGAATCTGTCTCTGTCATCAAGCACACTGATCCCG	174.208	52.0417	7.01544	4.85984	293.167	167.5	154.833	81.3333	47.1667	30.1667	68.1667	62.6667	7.50909	6.57517	7.39372	6.58376	5.08274	4.92084	4.74253	4.69324
ASCRP001522	0.0457471	0.40949	1.85352	up	hsa_circRNA_101159	hsa_circ_0002857	exonic	chr12	+	113705647	113707650	uc001tuw.3	TPCN1	ATGATCATCTTTGCCATCCTCGGTCCACGCCACCCTGGAGCTGTTT	68.125	52.75	5.77542	4.88515	67.3333	94.6667	53.8333	56.6667	80	35.6667	50	45.3333	5.31913	5.84613	5.87127	6.06516	5.55856	5.29071	4.35703	4.33432
ASCRP001538	0.000310652	0.0510096	2.3326	up	hsa_circRNA_101175	hsa_circ_0028899	exonic	chr12	+	120995084	120995485	uc001tyq.4	RNF10	AATGTAGACCATCCCATTCATCTAGGAGCGCATTTGTAGCCATGAA	84.125	48	6.0457	4.82376	107	117.167	54.3333	58	34.8333	33.8333	66	57.3333	6.05104	6.12527	5.8815	6.12498	4.81969	5.2587	4.65714	4.55951
ASCRP001578	0.0491628	0.41095	1.93101	up	hsa_circRNA_101215	hsa_circ_0029531	exonic	chr12	-	133245396	133248908	uc009zyu.1	POLE	TGACCAACCGCCTGCAGAATCCTGCCGCCTTTGACTTCCTGCTGCA	92.6667	67.3333	6.17728	5.22792	142.167	104	71	53.5	99	49.3333	61.3333	59.6667	6.48237	5.96061	6.29345	5.97268	5.84381	5.87374	4.58296	4.61116
ASCRP001588	0.0275847	0.357243	1.74099	up	hsa_circRNA_101225	hsa_circ_0029633	exonic	chr13	+	20625572	20641530	uc001umw.3	ZMYM2	AATACAGGAGGCTGCAAGGTGTGACTGTTGTAAATCTCAAGGAACT	67.7917	55.5	5.7748	4.9749	101	67	59.3333	43.8333	69	36.8333	62.8333	53.3333	6.00037	5.45625	6.02521	5.61738	5.41231	5.35251	4.64322	4.49155
ASCRP001589	4.65919e-06	0.00253149	5.12246	up	hsa_circRNA_101226	hsa_circ_0029634	exonic	chr13	+	20632714	20633702	uc001umw.3	ZMYM2	ATATTCCTGTTCCTACTACAGTTCCTGTTCCTGGTTCAGCACCACC	170.875	47.25	7.07252	4.71568	173.333	264.667	125.833	119.667	42.6667	27.3333	61.6667	57.3333	6.75077	7.29867	7.09379	7.14684	4.98784	4.74045	4.57057	4.56385
ASCRP001620	0.00832707	0.246784	3.8174	up	hsa_circRNA_101258	hsa_circ_0004711	exonic	chr13	-	42385360	42393522	uc001uyj.3	KIAA0564	GTTACTAAAGCCTGCCTTTCCAGATCCATTTTTCCTATCCATCCCT	182.167	65.875	7.05134	5.11875	267.167	270.167	100.167	91.1667	126.833	45.5	47.1667	44	7.36716	7.32741	6.75281	6.75797	6.12369	5.71626	4.30332	4.33173
ASCRP001740	0.0315792	0.369242	2.43713	up	hsa_circRNA_101381	hsa_circ_0004781	exonic	chr14	+	71413631	71435827	uc001xmn.4	PCNX	GAAGAACAAGGCCCTTCCTTCTACCATGATTATAGTAGCAGTTTAT	294.125	133.458	7.85707	6.57188	486.167	281	202.667	206.667	225.5	125.5	98.5	84.3333	8.06519	7.3846	7.84461	8.13386	7.04657	7.38131	6.42884	5.4308
ASCRP001882	0.0306092	0.369242	2.41894	up	hsa_circRNA_101531	hsa_circ_0035445	exonic	chr15	-	58302846	58306479	uc002aex.3	ALDH1A2	ACCATTCCTGTAGATCTTTATAAACAACGAGTGGCAGAACTCAGAG	121.375	63	6.35213	5.07776	264.333	106.333	59	55.8333	34.8333	27.1667	75.3333	114.667	7.36904	5.99155	5.99512	6.05283	4.71559	4.68619	4.94866	5.96059
ASCRP001890	0.0190441	0.337642	1.95129	up	hsa_circRNA_101539	hsa_circ_0005402	exonic	chr15	-	60648117	60674640	uc002agk.3	ANXA2	TGATGGTTGCCCTGGCAAAGCACTCTACACCCCCAAGTGCATATGG	102.792	71.7917	6.35394	5.38951	112.833	154.833	69.8333	73.6667	84.3333	56.1667	70.5	76.1667	6.1534	6.49525	6.28887	6.47825	5.63521	6.08154	4.77228	5.06902
ASCRP002112	0.0325683	0.369242	1.57102	up	hsa_circRNA_101766	hsa_circ_0000682	exonic	chr16	+	24043456	24046868	uc002dmd.3	PRKCB	GACGTCCTCATTGTCCTCGGACCCCCGCAGCAAACACAAGTTTAAG	77.0417	69.6667	5.91771	5.26601	105.167	98	52.3333	52.6667	97	39	75	67.6667	6.02195	5.87138	5.84078	5.93675	5.81577	5.48255	4.92663	4.83909
ASCRP002386	0.0195545	0.34273	20.1741	up	hsa_circRNA_102051	hsa_circ_0006220	exonic	chr17	+	35800605	35800763	uc002hnw.3	TADA2A	TGACACAGCCATTCCATTTCACTGCAGGATGTAGCCAATCAAATGT	14685.6	678.583	12.9797	8.64522	27864.7	15945.7	6994.83	7937.17	41.6667	712	1752	208.667	12.9797	12.9797	12.9797	12.9797	4.95519	9.91505	11.3409	8.36979
ASCRP002426	0.0428147	0.40108	1.75046	up	hsa_circRNA_102091	hsa_circ_0044158	exonic	chr17	-	43197691	43198739	uc002iib.3	PLCD3	ATGAACGACATGTACGCCTACCTCCTCTTCAAGGCCTGACGGAGGA	105.458	81.375	6.34399	5.53625	114.5	172.333	64.3333	70.6667	120.167	53.5	82.1667	69.6667	6.19497	6.60905	6.14207	6.42989	6.05929	6.00125	5.23543	4.84906
ASCRP002451	0.000319042	0.0510096	2.4136	up	hsa_circRNA_102119	hsa_circ_0044436	exonic	chr17	+	47874111	47875920	uc002ipl.2	KAT7	AACTCTCTAGATTCCAGTCCTGTTCGAAATCTGCAGTCTTTTGGCA	67.4583	36.625	5.68255	4.41136	66.3333	111	43.6667	48.8333	26.6667	25.6667	49.6667	44.5	5.28186	6.07025	5.59888	5.77919	4.44549	4.53631	4.33664	4.327
ASCRP002523	1.35355e-05	0.00551571	2.58247	up	hsa_circRNA_102195	hsa_circ_0045714	exonic	chr17	+	73808192	73809959	uc002jpm.3	UNK	CCACCCCGAGGTGCCCATTCCTGCACAGAACCACAGGGGACACTGA	118.083	60.375	6.53062	5.16187	137.333	169.833	86.6667	78.5	49.3333	29.6667	82.8333	79.6667	6.41094	6.57487	6.57701	6.55967	5.09608	4.91349	5.3424	5.29553
ASCRP002548	0.00503051	0.190691	1.51194	up	hsa_circRNA_102220	hsa_circ_0009101	exonic	chr17	-	79244717	79258695	uc002jzz.1	SLC38A10	TTTCCTCCCAGCATTCCACGCCTACGGGAAGGCAGGCAAGATGCTG	52.875	51.125	5.43707	4.84066	71	59	38.1667	43.3333	49	30.1667	62	63.3333	5.39407	5.31013	5.41541	5.62865	5.11336	4.9663	4.59138	4.69161
ASCRP002643	0.000908979	0.0740818	2.3071	up	hsa_circRNA_102324	hsa_circ_0047151	exonic	chr18	-	21001330	21010641	uc002kuf.3	TMEM241	GCAGTTCAAGTATGTGCTGTCTGTCTTGAAATTTACCTACCCTACA	70.0417	42.875	5.80273	4.59665	111.667	63	61.3333	44.1667	35.3333	25.3333	58.6667	52.1667	6.13384	5.36457	6.05801	5.6545	4.84447	4.55333	4.51774	4.47106
ASCRP002667	0.0142479	0.31543	1.60234	up	hsa_circRNA_102348	hsa_circ_0007535	exonic	chr18	+	33722243	33739978	uc002kzk.2	ELP2	TTCAAAAACTTTTCAGAAAGTGCTTTCTCTCTGTGGACATGAGGAT	44.875	41.9583	5.22617	4.54599	50.8333	44	48	36.6667	33.6667	25.3333	55.8333	53	4.91162	4.98578	5.71764	5.28964	4.78085	4.48381	4.45345	4.46587
ASCRP002705	0.0489635	0.41095	1.65179	up	hsa_circRNA_102386	hsa_circ_0007725	exonic	chr18	-	74090809	74092259	uc002lmd.3	ZNF516	GAGCACAGAGGGGGACAGCCGCGCCGCTGCTGCTTTTCCGAAGAGG	60.25	51.375	5.64277	4.91874	72.3333	54.6667	68.3333	45.6667	44.8333	37.8333	62.3333	60.5	5.4168	5.23026	6.23082	5.6932	5.05076	5.41907	4.59121	4.61391
ASCRP002753	0.0291878	0.369242	1.93512	up	hsa_circRNA_102434	hsa_circ_0049138	exonic	chr19	+	9435370	9435456	uc002mld.3	ZNF559	ATTCTGTCGTGTCCCGGAACAGCATCTCTGCCTTCCTGTTCACGGT	71.375	51.875	5.82353	4.87111	77	96.8333	60.8333	50.8333	80	34.3333	46.8333	46.3333	5.48694	5.8816	6.04663	5.87895	5.5884	5.20015	4.33029	4.36561
ASCRP002757	0.00124459	0.0882038	1.53912	up	hsa_circRNA_102438	hsa_circ_0049220	exonic	chr19	-	10270333	10288043	uc002mng.3	DNMT1	CCTGCTTCAGCTGAACCTTCACCTAGCCCCAGGATTACAAGGAAAA	57.5833	54.7917	5.534	4.91189	71.6667	73.6667	41.3333	43.6667	51.6667	31.8333	66.3333	69.3333	5.43333	5.56217	5.53211	5.60836	5.15881	4.9841	4.68642	4.81822
ASCRP002764	0.0065821	0.210369	3.25085	up	hsa_circRNA_102445	hsa_circ_0004552	exonic	chr19	+	11015626	11019883	uc002mpz.3	CARM1	TCAAGGACAAGATGAAGATGTGTGTGTCTTTAAGTGCTCAGTGTCC	168.25	62.0833	6.83274	5.13192	304.667	211.5	92.8333	64	80.8333	45	71.3333	51.1667	7.57272	6.82725	6.69185	6.23914	5.57048	5.73572	4.80635	4.41515
ASCRP002779	0.0373324	0.375536	2.97193	up	hsa_circRNA_102462	hsa_circ_0049700	exonic	chr19	+	14034145	14034624	uc002mxq.1	CC2D1A	AGCGTCATCAAGTGCCGCCTGCCCCTGTCAACAAGGACGACTTTGC	394.75	154.208	8.41334	6.84194	492.833	433.5	375.5	277.167	276.5	132	130	78.3333	8.10339	8.08256	8.81797	8.64944	7.23107	7.46942	7.49315	5.17412
ASCRP002790	0.0103593	0.273299	1.65726	up	hsa_circRNA_102473	hsa_circ_0003215	exonic	chr19	+	17267718	17270294	uc002nfj.1	MYO9B	AGCTTATCCTTCCCTACAGCCTCAGCGAGGATTTTTGCCGTCCTCT	51.9583	43.3333	5.38464	4.65583	72.8333	53.1667	40.5	41.3333	48.5	29	52.6667	43.1667	5.3949	5.18294	5.44893	5.51177	5.10099	4.81275	4.41011	4.29947
ASCRP002809	0.0104514	0.273299	2.25624	up	hsa_circRNA_102492	hsa_circ_0050205	exonic	chr19	-	19260034	19261573	uc002nlo.2	MEF2BNB-MEF2B	CATCCTCGAGACAAAGATCATTCCACTCAGCCTGGGACGATGGGGA	85.6667	53.625	6.11038	4.93646	65.3333	115.333	68.1667	93.8333	36.8333	31.8333	74.8333	71	5.2695	6.13124	6.22982	6.81095	4.87645	5.02753	4.95752	4.88432
ASCRP002827	0.0377781	0.375536	1.93448	up	hsa_circRNA_102513	hsa_circ_0050486	exonic	chr19	+	34868407	34868786	uc002nvf.3	GPI	TCCTCCCTGTTCATCATTGCCTCCAAGCGTGTCCGGAGCGGTGACT	104.625	79.625	6.3331	5.38116	163.833	124.167	67.6667	62.8333	134.167	45	77.3333	62	6.67166	6.23541	6.19971	6.22563	6.18311	5.68464	4.97509	4.68179
ASCRP002883	0.00791863	0.239025	2.21199	up	hsa_circRNA_102570	hsa_circ_0051470	exonic	chr19	-	45860527	45860957	uc002pbi.2	ERCC2	CTGCCCTATGGCTTCACCATCATCATCGAGCCCTTTGACGACAGAA	153.958	80.7917	6.921	5.77566	180.5	209.667	96.3333	129.333	74.3333	75.8333	83.6667	89.3333	6.83075	6.82582	6.73053	7.29691	5.49948	6.52431	5.32963	5.74921
ASCRP002892	0.0241644	0.357243	2.07809	up	hsa_circRNA_102579	hsa_circ_0002311	exonic	chr19	-	47285639	47287816	uc002pfr.3	SLC1A5	GGATCATGTGAAATATCTTCCCTTCCAACCTGGTGTCAGCAGCCTT	84.125	59.625	6.10764	5.05238	92.1667	98.6667	74.3333	71.3333	85.1667	40.5	62	50.8333	5.74669	5.91394	6.35185	6.41806	5.64084	5.53718	4.58158	4.44991
ASCRP002932	0.00119229	0.0882038	48.1103	up	hsa_circRNA_102619	hsa_circ_0000977	exonic	chr2	-	10784445	10808849	uc002rap.2	NOL10	CCCAAGATGGGCATCTATTACATTCCATTCTGAAGTTTATAGGTTA	6178.25	128.25	11.8786	6.29037	8448.17	8578.83	3579.17	4106.83	30	228.167	196.167	58.6667	11.8786	11.8786	11.8786	11.8786	4.60965	8.19976	7.7242	4.62788
ASCRP002958	0.0016845	0.095517	2.03052	up	hsa_circRNA_102645	hsa_circ_0053063	exonic	chr2	-	26453059	26457223	uc010yks.2	HADHA	GAACCCCTGGCATGTTAGCCGCTTGCAAGACCCTTCAAGAAGTAAC	77.9167	50.9583	5.84313	4.82128	76.8333	131	44.8333	59	39.3333	28.1667	73.3333	63	5.44872	6.25142	5.64332	6.02907	4.92837	4.75674	4.89615	4.70387
ASCRP002999	0.0106193	0.273299	1.85018	up	hsa_circRNA_102687	hsa_circ_0002938	exonic	chr2	+	36726361	36749456	uc002rpd.3	CRIM1	TACTGCATAGAACCAACCATCATCACAGTTGATCCACCTGCATGTG	73.4583	54.0833	5.89684	5.00917	79.3333	93	51.1667	70.3333	35.5	39.1667	75.1667	66.5	5.5309	5.82825	5.82019	6.40802	4.86948	5.47419	4.92591	4.76713
ASCRP003032	0.0163969	0.322012	1.71611	up	hsa_circRNA_102720	hsa_circ_0005045	exonic	chr2	-	55214626	55214834	uc002ryc.3	RTN4	AGGCCACCCATTCAGTTGTTGACCTCCTGTACTGGAGAGACATTAA	69.25	56.0833	5.70762	4.92848	97.8333	99	36.5	43.6667	68.5	32	67.3333	56.5	5.91569	5.9314	5.38223	5.60114	5.42594	5.04018	4.70342	4.54437
ASCRP003152	0.0497637	0.413852	1.88617	up	hsa_circRNA_102844	hsa_circ_0007024	exonic	chr2	+	169547543	169574488	uc002ueb.1	CERS6	TTCCTCTCTGACCCCCTGGTTGTGGAATACGAGGCATTGCTGGTAC	94.125	72.75	6.15694	5.24148	132.333	133	59.3333	51.8333	123.667	41	70.3333	56	6.40517	6.31949	5.98012	5.92298	6.09476	5.53394	4.79284	4.54438
ASCRP003189	0.000581537	0.0631937	1.66254	up	hsa_circRNA_102881	hsa_circ_0057582	exonic	chr2	-	197135916	197172809	uc002utl.1	HECW2	TACCAGGAATCACTCACTCAGACTGGGAGGCACGCATTGACAGCCA	66.9583	55.125	5.73053	4.99715	92.3333	78.1667	46.6667	50.6667	41.3333	35.3333	76	67.8333	5.74408	5.62001	5.69594	5.86211	4.96716	5.26019	4.98062	4.78062
ASCRP003290	0.0166543	0.322757	2.86704	up	hsa_circRNA_102983	hsa_circ_0005265	exonic	chr20	+	2928627	2945848	uc002whl.3	PTPRA	CTTTCCCTCCTTCAGGACACATGTTCAAAGAGCATAATTAACTTTT	251.458	99.7083	7.47772	5.95816	479.167	239	149.333	138.333	155	83.1667	93.5	67.1667	8.05384	7.0687	7.35505	7.43328	6.36288	6.70998	5.94948	4.81029
ASCRP003291	0.00923174	0.263995	2.88095	up	hsa_circRNA_102984	hsa_circ_0006117	exonic	chr20	+	2944917	2945848	uc002whl.3	PTPRA	TTCCCTCCTTCAGATAAGCATGGATTCCTGGTTCATTCTTGTTCTG	139	67.0417	6.77068	5.24414	225.667	139	98.3333	93	99.6667	49.8333	70.1667	48.5	7.13369	6.37195	6.76873	6.80836	5.87905	5.86103	4.84483	4.39164
ASCRP003509	0.0342795	0.369242	1.50389	up	hsa_circRNA_103211	hsa_circ_0063158	exonic	chr22	-	36872779	36872903	uc003apk.1	TXN2	AGACCTCGCCATTGAGTATGAGGTGGTGTGGACCCTGCAAGATCCT	53.3333	49.0417	5.39504	4.80634	83.5	51.1667	42.5	36.1667	56.3333	31.3333	56.5	52	5.60488	5.1433	5.55727	5.2747	5.22676	5.00765	4.50201	4.48894
ASCRP003518	0.0257221	0.357243	1.96107	up	hsa_circRNA_103220	hsa_circ_0063300	exonic	chr22	-	38695899	38696957	uc003avj.3	CSNK1E	GGCTATCCCTATCAGCCGCATCGAGTATATCCACTCCAAGAACTTC	62.625	45.625	5.68304	4.7114	55	68.6667	53.6667	73.1667	32.3333	30.5	63.6667	56	4.96249	5.42926	5.87858	6.46185	4.76986	4.90603	4.62366	4.54605
ASCRP003523	0.0205893	0.351014	2.17225	up	hsa_circRNA_103225	hsa_circ_0063331	exonic	chr22	-	38894089	38897285	uc003avx.4	DDX17	ACTTGGAAAGGGGAGATGGCCCAATCATTTGGAGCAAGAGGTGGTG	157.792	77.7083	6.88145	5.76226	203	244	97.8333	86.3333	58.1667	82.6667	90	80	6.96196	7.1298	6.74756	6.68645	5.26022	6.69645	5.864	5.22835
ASCRP003583	0.0329021	0.369242	1.80031	up	hsa_circRNA_103285	hsa_circ_0064288	exonic	chr3	+	11348416	11350535	uc003bwc.3	ATG7	TACTCCTCAACAAGTTCCTCCTCTTGACATTTGCAGAGTGCTCCCA	87.2083	67.625	6.07817	5.22993	98	136.667	56.5	57.6667	97.3333	41.5	75	56.6667	5.89412	6.36296	5.94789	6.10773	5.83783	5.55014	4.98811	4.54364
ASCRP003607	0.0447665	0.406989	3.60778	up	hsa_circRNA_103309	hsa_circ_0064644	exonic	chr3	+	29910348	29941246	uc003cek.3	RBMS3	GCAACCAACACCCCCAGTGAGCCTTTGCTGTGCAAATTCGCTGATG	372.208	124.167	7.90228	6.05117	838.333	351	143.667	155.833	234.833	113.833	75.6667	72.3333	9.00768	7.67438	7.28677	7.6403	7.07942	7.19159	4.95047	4.98319
ASCRP003643	0.00779441	0.239025	1.88627	up	hsa_circRNA_103345	hsa_circ_0065173	exonic	chr3	-	47155365	47168153	uc003cqv.3	SETD2	GGGCTTGAGAGCTGCCAAAGACCTTCCTTCAGAAGAAGAAAATGAG	79.25	58.125	6.03809	5.12255	101.833	82.1667	65	68	42.3333	43.8333	77	69.3333	5.97932	5.67517	6.14912	6.34876	5.0095	5.66746	4.9672	4.84605
ASCRP003682	0.000403139	0.0510096	1.86669	up	hsa_circRNA_103384	hsa_circ_0065898	exonic	chr3	-	51454240	51456330	uc003dbf.1	VPRBP	CATTGCCCACATTCCGTCCTATTTCAGTGTTCCGGGAAGCCAATGA	58.2917	43.8333	5.52005	4.61956	69.6667	79	43.1667	41.3333	39.6667	26.3333	58.3333	51	5.33694	5.63703	5.57451	5.53171	4.9376	4.59002	4.49838	4.45225
ASCRP003688	0.00414476	0.177788	2.15632	up	hsa_circRNA_103390	hsa_circ_0066147	exonic	chr3	-	52960046	52962357	uc010hmr.3	SFMBT1	CTTCCCTCCGGTTTTTGATGAGAAGTACTTTCTGGTGGAAATGGAT	80.0833	54.0833	6.00684	4.89827	125.333	78.6667	59	57.3333	63.6667	32.6667	68	52	6.32223	5.62473	5.99745	6.08293	5.35192	5.07819	4.7247	4.43826
ASCRP003701	0.024465	0.357243	1.81079	up	hsa_circRNA_103403	hsa_circ_0066367	exonic	chr3	+	58131647	58135954	uc003djj.2	FLNB	TGAAAATCCCAGAGAGCCCACTCCAGTTCTACGTGAACTACCCCAA	79.0417	60.5417	5.9946	5.13798	70	97.3333	62.8333	86	53.5	36.5	80.6667	71.5	5.33933	5.88701	6.0738	6.67824	5.17891	5.23047	5.23597	4.90657
ASCRP003755	0.0404706	0.385772	1.94729	up	hsa_circRNA_103457	hsa_circ_0067159	exonic	chr3	-	127294245	127294652	uc003ejl.2	TPRA1	ATCATCGAGGGGCTCTGGTCTACTCTCTGGTGGTCATCCTTCCCAA	87.0417	67.0833	6.16271	5.20125	116.667	86	87.8333	57.6667	101.667	41.6667	65	60	6.20893	5.75745	6.58047	6.104	5.89521	5.62815	4.65048	4.63114
ASCRP003808	0.0442584	0.406989	1.50323	up	hsa_circRNA_103510	hsa_circ_0067934	exonic	chr3	+	170013698	170015181	uc003fgs.2	PRKCI	CCCGTTCTTCCGAAATGTTGATTGGGATATGTTATTTTGGAAAAAC	53.9167	46.25	5.39664	4.80858	81.3333	57.8333	37.8333	38.6667	42.8333	35.8333	53.3333	53	5.56893	5.26725	5.33988	5.41052	4.99853	5.34893	4.43424	4.45262
ASCRP003871	0.0028063	0.130693	2.4318	up	hsa_circRNA_103573	hsa_circ_0002319	exonic	chr3	+	197592982	197598333	uc003fyk.2	LRCH3	ACCAGCTGTATTCATCATTCCCCTGCATATTCTTTTCCTGCTGCTA	73.8333	41.5	5.91443	4.63241	78	92.6667	68.3333	56.3333	49.1667	28.8333	46.3333	41.6667	5.50386	5.84066	6.24887	6.06433	5.12882	4.82838	4.29583	4.27661
ASCRP003949	0.0243562	0.357243	1.64695	up	hsa_circRNA_103655	hsa_circ_0007883	exonic	chr4	-	73956383	73958017	uc003hgr.3	ANKRD17	ACCTGCTCCAAGTCCCTCAGGGGTGGCACTGAATCAACAAGACAAG	75.7917	60.1667	5.77353	5.05374	95.5	127.167	39.8333	40.6667	66.3333	35	72	67.3333	5.87143	6.25578	5.44019	5.52674	5.39261	5.23229	4.81979	4.77026
ASCRP004005	0.0130816	0.300324	1.78646	up	hsa_circRNA_103712	hsa_circ_0007540	exonic	chr4	-	107092251	107133992	uc003hyb.2	TBCK	AGACAGATCTGAGTATCTGACTGTCTTCTCTCAGATGATTGCATTT	46.875	35.875	5.29383	4.45673	57.6667	40.5	52.6667	36.6667	32.5	24.6667	46.3333	40	5.10126	4.89196	5.86756	5.31454	4.7647	4.50911	4.30921	4.24388
ASCRP004071	0.0153518	0.322012	1.70542	up	hsa_circRNA_103781	hsa_circ_0071681	exonic	chr5	+	896779	901546	uc003jbr.3	TRIP13	CTGCTCCACGCCCATCGATTTGAGTGCATGCACTGTTGCACTTCAC	62.5	47.5417	5.5653	4.79517	99	72.1667	39.3333	39.5	50.6667	32.5	55.8333	51.1667	5.89291	5.51285	5.43347	5.42197	5.16294	5.12315	4.44808	4.44653
ASCRP004091	0.0471139	0.40949	2.6924	up	hsa_circRNA_103801	hsa_circ_0071989	exonic	chr5	-	16683988	16764505	uc010itx.3	MYO10	ATTCTGTGTGTGCCTCTGACAGCCCTGATAGGCAGTAGACAGCAGG	161.5	63.7083	6.52591	5.09702	401.5	135	59.6667	49.8333	97.5	38.6667	63.3333	55.3333	7.90895	6.33312	6.02389	5.8377	5.82761	5.46472	4.57617	4.51958
ASCRP004128	0.0157925	0.322012	3.12797	up	hsa_circRNA_103838	hsa_circ_0072464	exonic	chr5	-	53409031	53450469	uc003jpg.1	ARL15	AGTACAAGAGGTTTTAGTATTAAAGCAGTGCCATTCCAGAATGCCA	115.833	48.0417	6.3966	4.75137	54.3333	186	113.5	109.5	27.6667	29.3333	75	60.1667	4.96513	6.7014	6.89694	7.02294	4.50276	4.87196	4.98669	4.64409
ASCRP004170	0.00175798	0.095517	2.50959	up	hsa_circRNA_103890	hsa_circ_0007158	exonic	chr5	-	74109664	74137504	uc003kdl.3	FAM169A	ACTGTCTTCTCTCATGTATACAGAGGATGGCATTCCCTGTGGATAT	83.2917	44.5	5.96026	4.63281	155.333	66.8333	63.6667	47.3333	34.8333	26.5	59.3333	57.3333	6.54594	5.43125	6.10385	5.76001	4.83644	4.59543	4.5306	4.56876
ASCRP004283	0.0114079	0.28174	1.8835	up	hsa_circRNA_104003	hsa_circ_0074903	exonic	chr5	-	168110970	168112932	uc003mab.3	SLIT3	GAGTTCCCCTCCAACCACAGTGTACAGTGGACCCTTCTGTGAACAC	106.75	77.875	6.37861	5.46519	156	132	74	65	114	45.5	72.5	79.5	6.60116	6.30988	6.34042	6.26297	6.01151	5.6827	4.8999	5.26665
ASCRP004499	7.9581e-07	0.000648585	5.49996	up	hsa_circRNA_104227	hsa_circ_0078297	exonic	chr6	+	151336015	151336829	uc003qoc.3	MTHFD1L	AAAGAAGCCGATTCCAGTTCCTGTATGATGTTCAGAACATCCAGCT	194	49.5	7.24695	4.78753	240	288	133.5	114.5	33	26	63	76	7.24781	7.42843	7.21521	7.09637	4.80296	4.64784	4.64582	5.05351
ASCRP004540	0.00888819	0.25871	31.997	up	hsa_circRNA_104270	hsa_circ_0001666	exonic	chr6	+	170626457	170639638	uc003qxo.1	FAM120B	TGCAGATGACCATTCCAGATCCTTTCCCGGAGTTCAGTTATGGGTG	10223.9	250.375	12.4322	7.43238	20167	11560.5	4067	5101	51	343.5	528	79	12.4322	12.4322	12.4322	12.4322	5.18014	8.78793	10.4671	5.29429
ASCRP004574	0.0041102	0.177788	1.70545	up	hsa_circRNA_104310	hsa_circ_0079385	exonic	chr7	+	6624646	6624891	uc003sqh.3	ZDHHC4	TTATGGACACGGTCTTTCTTATTCAGGTGTGTGTAACTGGTGTGTG	48	33.75	5.23737	4.46721	60	53	44	35	30	27	42	36	5.18827	5.21117	5.49651	5.05351	4.5872	4.81648	4.25677	4.2084
ASCRP004636	0.026691	0.357243	5.05975	up	hsa_circRNA_104374	hsa_circ_0080210	exonic	chr7	-	50737418	50773020	uc010kzb.2	GRB10	GCCGCCGCAAAGCAGATATTCTGGAGGAAGGTGTGAACGCAACTTT	661.125	121.125	8.97926	6.6402	1331.5	389	633	291	86.5	174	143	81	9.63694	7.83873	9.63694	8.80443	5.65898	7.92783	7.67969	5.29429
ASCRP004661	0.0482344	0.40949	1.68133	up	hsa_circRNA_104401	hsa_circ_0005513	exonic	chr7	+	74119495	74133260	uc003uau.3	GTF2I	ACTATTGAAGGTGGTCGTGTGATGGTAACAGATGCTGACAGGTCAA	63.5	50.25	5.56878	4.81917	120.5	52.5	46	35	51	32	68.5	49.5	6.24113	5.1818	5.67619	5.17599	5.11966	5.04281	4.72577	4.38845
ASCRP004665	0.0337717	0.369242	2.21773	up	hsa_circRNA_104405	hsa_circ_0080638	exonic	chr7	+	74433139	74434317	uc003ubo.2	GATSL1	CGCAGCAGAGTCCAGAGGCCAGTCATCCACCCACTGTCCAGCCCGA	140.75	89.5	6.78084	5.63176	117	222	102	122	145.5	63	80	69.5	6.2206	6.92665	6.80108	7.17501	6.27544	6.23954	5.1703	4.84173
ASCRP004736	0.032204	0.369242	3.38619	up	hsa_circRNA_104482	hsa_circ_0082314	exonic	chr7	+	129367080	129367205	uc003voz.3	NRF1	TTACTGGAGTCCAAGATGCTAATGCGAAGCTGCCGCCCATGCTGTC	145.875	55	6.8266	5.06693	100	103.5	263	117	43	50	70	57	5.93871	5.95888	8.29715	7.11166	5.03458	5.90298	4.7566	4.57358
ASCRP004797	0.0137513	0.321348	3.16316	up	hsa_circRNA_104543	hsa_circ_0083172	exonic	chr7	+	157151240	157160177	uc003wnl.3	DNAJB6	GACTTCTTTGGACCCATTCCAACAATCTCGTAAAACATGGTGGATT	577.917	103.083	8.44445	6.78309	912.5	1064.67	147.833	186.667	91.1667	125.833	91	104.333	9.08029	9.34595	7.32326	8.02832	6.746	7.05515	6.51739	6.8138
ASCRP004869	0.00163573	0.095517	1.69683	up	hsa_circRNA_104616	hsa_circ_0002003	exonic	chr8	+	48320422	48353104	uc003xqd.3	KIAA0146	TCCCTCCCTGAGGTGGACTAGCAGAAAGACTAAATGGACTGCAGAA	77.375	65	5.96628	5.20344	101.5	88	60	60	66	34	87	73	5.95127	5.76951	6.01868	6.12564	5.38462	5.10751	5.41094	4.91068
ASCRP005030	0.0388144	0.38236	1.54814	up	hsa_circRNA_104780	hsa_circ_0001861	exonic	chr9	+	37424841	37426651	uc010mlv.1	GRHPR	AAGTGAAGAACTGTGAGGTGGAGCAGTGGGACTCGGATGAGCCCAT	56.375	50.375	5.48564	4.85511	83	56	51	35.5	52.5	36	61	52	5.6203	5.24937	5.79159	5.2813	5.16529	5.23119	4.56111	4.46283
ASCRP005301	0.0122995	0.290553	1.81092	up	hsa_circRNA_400005	hsa_circ_0092329	intronic	chr1	+	26898944	26899164	NM_001006665	RPS6KA1	ACACAGAGCACACCACCTCCGTACCTTGTTGGGGTAACCTGGTGAT	70.625	57.75	5.8472	4.99048	90.5	88.5	50	53.5	69	39	65	58	5.80716	5.79159	5.81338	5.97669	5.43054	5.37022	4.64582	4.51535
ASCRP005305	0.000438119	0.0510096	4.5902	up	hsa_circRNA_400009	hsa_circ_0092340	intronic	chr1	+	46079180	46079500	NM_001195193	NASP	ATAGATAACTGTCTCTTGATTATGGAATCTCTGTCTCTGCCCAGGC	217.75	64.5	7.47399	5.27543	263	242	240	126	72	37	85	64	7.35396	7.08578	8.19992	7.25629	5.43054	5.39531	5.57552	4.70035
ASCRP005358	0.0456201	0.40949	1.59669	up	hsa_circRNA_400064	hsa_circ_0092315	intronic	chr21	+	45545508	45545708	NM_005049	PWP2	GCTTCCACACCCACGCCCCATCGGGGCAGAAGCCCACTGTCCCCTA	73	64.25	5.84802	5.17294	106	88.5	48	49.5	78	44.5	71	63.5	6.03478	5.76288	5.72323	5.87118	5.532	5.70368	4.73684	4.71922

## Sheet: down_OA_vs_FNF
Supplementary Material
# Fold Change cut-off: 1.5 # P-value cut-off: 0.05 # Condition pairs: OA_vs_FNF # Column A: probeID it represents probe name. # Column B: P-value, P-value calculated from unpaired t-test. # Column C: FDR, FDR is calculated from Benjamini Hochberg FDR. # Column D: FC (abs), the absolute ratio (no log scale) of normalized intensities between two conditions. # Column E: Regulation, it depicts which …
OA_vs_YN 1.5 fold down regulated CircRNAs
	P-value and FDR		Fold change and Regulation		Annotations										Group--Raw Intensity		Group--Normalized Intensity		Raw Intensity								Normalized Intensity
probeID	P-value	FDR	FC (abs)	Regulation	circRNA	Alias	circRNA_type	chrom	strand	txStart	txEnd	best_transcript	GeneSymbol	Sequence	group-OA(raw)	group-YN(raw)	group-OA(normalized)	group-YN(normalized)	[OA1, OA](raw)	[OA2, OA](raw)	[OA3, OA](raw)	[OA4, OA](raw)	[YN1, YN](raw)	[YN2, YN](raw)	[YN3, YN](raw)	[YN4, YN](raw)	[OA1, OA](normalized)	[OA2, OA](normalized)	[OA3, OA](normalized)	[OA4, OA](normalized)	[YN1, YN](normalized)	[YN2, YN](normalized)	[YN3, YN](normalized)	[YN4, YN](normalized)
ASCRP000044	0.0183636	0.333802	1.55286	down	hsa_circRNA_000422	hsa_circ_0001545	intragenic	chr5	+	149778518	149778894	NM_000356	TCOF1	GCTTTAGGGGGTGGGGGCAGCAGTGGGTGGGGAAAAGCTGCAGGTC	56.2917	87.4167	5.50271	6.13764	71	68.6667	40.3333	45.1667	98	53.6667	93.5	104.5	5.37914	5.46646	5.46031	5.70495	5.82699	5.98207	6.07012	6.67139
ASCRP000958	0.00152305	0.095517	1.74475	down	hsa_circRNA_100579	hsa_circ_0007503	exonic	chr10	+	28872327	28884970	uc001iuh.3	WAC	GAAAGAAAAGGGACCAGTTACTCTCCACAAGAAAATTCACACAACC	42.8333	86.25	5.1651	5.96812	52.6667	46.3333	34.3333	38	107.833	43.6667	91.3333	102.167	4.97392	5.07595	5.21661	5.39393	5.95831	5.67419	6.00998	6.23
ASCRP001223	0.0403461	0.385772	2.89166	down	hsa_circRNA_100849	hsa_circ_0004291	exonic	chr11	+	65061623	65063461	uc001odj.3	POLA2	AGAGCTGAGGTACTTCGTGAAGCTCCGGCTCCCACCTTGTCTTTGT	59.75	134.75	5.52499	7.05688	70.6667	84.3333	43.3333	40.6667	130.333	52	194.833	161.833	5.32755	5.72557	5.55364	5.49319	6.14495	5.96264	8.17125	7.9487
ASCRP001444	0.0270662	0.357243	1.70277	down	hsa_circRNA_101076	hsa_circ_0026652	exonic	chr12	+	53856276	53862616	uc001sdk.4	PCBP2	TCCAAACGATTCCCCCCCGAAGGGCGTGACCATCCCGTACCGGCCC	75.875	101	5.82646	6.59434	100.167	115.667	44.6667	43	108.833	79.1667	104.167	111.833	5.94196	6.11969	5.63714	5.60706	5.95803	6.62161	6.72202	7.07572
ASCRP001596	0.0336017	0.369242	1.56483	down	hsa_circRNA_101233	hsa_circ_0008784	exonic	chr13	+	24164288	24200931	uc001uot.3	TNFRSF19	CCTTACGAACCGCACTAACTCTCCAACAATAAATACATTTGATAAG	41.625	84.125	5.00187	5.64788	49.6667	50.5	31.6667	34.6667	129.667	40.5	90.6667	75.6667	4.85417	5.12702	4.89367	5.13263	6.14861	5.52918	5.81846	5.09527
ASCRP001829	0.0013788	0.0936434	1.58895	down	hsa_circRNA_101478	hsa_circ_0008946	exonic	chr15	+	40477365	40477843	uc010ucl.1	BUB1B	AGCCAGTTATCTCCAAGCCAGAACAGAGGACTCCAAAATCCATTTC	38	69.5	4.86953	5.5376	50	40.6667	29.1667	32.1667	68.3333	35.3333	88.1667	86.1667	4.89319	4.8574	4.79683	4.93069	5.39606	5.2859	5.74524	5.72321
ASCRP003844	0.0333659	0.369242	2.49297	down	hsa_circRNA_103546	hsa_circ_0006517	exonic	chr3	+	188202379	188242575	uc003frt.3	LPP	AGTGCAGCTCCCCCTATAAGCCTCGGCCTCCACAGGTGATTTTCTT	481.333	831.667	8.63342	9.95129	677.667	661.667	325.667	260.333	1937.5	304.667	611.167	473.333	8.76362	8.77594	8.5621	8.43203	9.87253	8.64456	10.6064	10.6816
ASCRP004618	0.0442887	0.406989	1.55828	down	hsa_circRNA_104356	hsa_circ_0079996	exonic	chr7	-	44053191	44056122	uc003tjc.2	POLR2J4	TTTCTGTACAGCCTGCAGAACTGATCACCATTAACAAGGACACCAA	39.25	71.875	4.8516	5.49156	57	41	27	32	85.5	30	91	81	5.00868	4.93836	4.63651	4.82287	5.63731	4.89588	6.03844	5.3946
ASCRP005240	0.0004203	0.0510096	2.28175	down	hsa_circRNA_104993	hsa_circ_0001917	exonic	chrX	-	41519691	41530783	uc004dfk.4	CASK	ATGGCTTAAGCCCCACTGTGTTCTCCTTGCCTCAAAAGAAAACTCG	99.75	210.875	6.30351	7.49365	115.5	146.5	76	61	473.5	131	123	116	6.19896	6.42443	6.44439	6.14627	7.91444	7.47665	7.38378	7.19976
ASCRP005307	0.0274442	0.357243	1.73075	down	hsa_circRNA_400011	hsa_circ_0092374	intronic	chr1	+	68151221	68151421	NM_001199741	GADD45A	CGAGCCCCGCGTGAGTCGGCCTGCGGACTCTTCCGGCCCGAACTTC	33.625	64	4.60921	5.40061	44.5	39	24	27	55	32	94	75	4.77193	4.86043	4.38465	4.41983	5.22249	5.17266	6.12974	5.07756
ASCRP005341	0.00502662	0.190691	1.55472	down	hsa_circRNA_400045	hsa_circ_0092332	intronic	chr19	-	8138461	8139361	NM_032447	FBN3	AATGATCTGGCCCCAATGCTCTGGGCACCACAGTCTGCCCCTTCAG	54.75	88.125	5.38312	6.01978	76.5	68	38.5	36	114	52.5	98	88	5.50514	5.48114	5.40457	5.14164	5.98355	5.98098	6.35114	5.76343
